# Supplementary material for: Lesion stage-dependent causes for impaired remyelination in MS
Source: Springer Nature journal article supplement (doi:10.1007/s00401-020-02189-9), 2020-07-24
Supplement: MOESM1 [file 18213148]

## **Lesion stage dependent causes for impaired remyelination in MS**

*Acta Neuropathologica*

Katharina Heß<sup>1</sup>, Laura Starost<sup>1,2</sup>, Nicholas W. Kieran<sup>3</sup>, Christian Thomas<sup>1</sup>, Jack Antel<sup>3</sup>, Gianvito Martino<sup>4</sup>, Inge Huitinga<sup>5</sup>, Luke Healy<sup>3</sup>, Tanja Kuhlmann<sup>1</sup>

<sup>1</sup>Institut für Neuropathologie, Universitätsklinikum Münster, 48149 Münster, Germany; <sup>2</sup>Max Planck Institut für molekulare Biomedizin, 48149 Münster, Germany; <sup>3</sup>Montreal Neurological Institute, McGill University, Montreal, Canada; <sup>4</sup>Neuroimmunology Unit, Institute of Experimental Neurology, Division of Neuroscience, IRCCS San Raffaele Hospital, 20132 Milan, Italy; <sup>5</sup>Department of Neuroimmunology, The Netherlands Institute for Neuroscience, Amsterdam, The Netherlands.

Corresponding author:

Tanja Kuhlmann, Institute of Neuropathology, University Hospital Münster, Pottkamp 2, 48149 Münster, Germany

Telephone +49 251 83 52614, Fax +49 251 83 56971

Email: [tanja.kuhlmann@ukmuenster.de](mailto:tanja.kuhlmann@ukmuenster.de)

## SUPPLEMENTARY TABLES AND FIGURES

**Table S1** Source and dilution of antibodies

| <b>Antibody</b>   | <b>Origin</b> | <b>Dilution</b> | <b>Source</b>                    | <b>Application</b> |
|-------------------|---------------|-----------------|----------------------------------|--------------------|
| CD3               | Mouse         | 1:25            | M7254, Dako                      | IHC                |
| CD20              | Mouse         | 1:700           | M0755, Dako                      | IHC                |
| CD68              | Mouse         | 1:200           | M0814, Dako                      | IHC                |
| CD163             | Mouse         | 1:200           | NCL-L-CD163,<br>Leica/Novocastra | IHC                |
| CD206             | Rabbit        | 1:100           | HPA004114, Sigma                 | IHC                |
| Cleaved Caspase 3 | Rabbit        | 1:300           | MAB835, R&D                      | ICC                |
| CNPase            | Mouse         | 1:1000          | 836404, BioLegend                | IHC                |
| iNOS              | Rabbit        | 1:1000          | ABN26, Millipore                 | IHC                |
| Ki-67             | Rabbit        | 1:200           | Ab16667, Abcam                   | IHC                |
| Ki-67             | Rabbit        | 1:250           | Ab16667, Abcam                   | ICC                |
| MBP               | Rat           | 1:200           | Ab7349, Abcam                    | IHC                |
| MBP               | Rat           | 1:50            | Ab7349, Abcam                    | ICC                |
| NOGOA             | Rabbit        | 1:200           | AB5664P, Millipore               | IHC                |
| O4                | Mouse         | 1:1000          | MAB1326, R&D                     | ICC                |
| OLIG2             | Mouse         | 1:200           | 387M-16, Medac                   | IHC                |
| TMEM119           | Rabbit        | 1:500           | HPA051870, Sigma                 | IHC                |
| TPPP/p25          | Rabbit        | 1:500           | Ab92305, Abcam                   | IHC                |

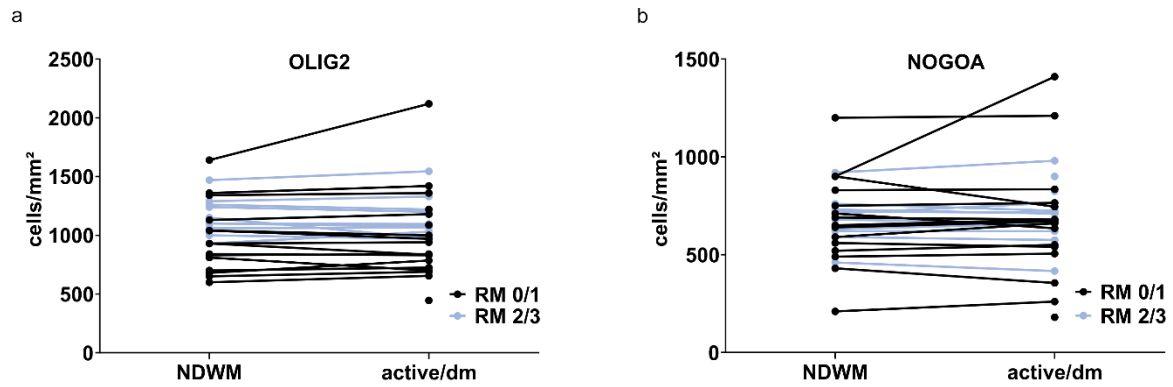

**Fig. S1** Preservation of oligodendrocytes in active/demyelinating lesions. **a and b** When comparing tissue samples containing NDWM and active/demyelinating lesions no significant differences in numbers of OLIG2<sup>+</sup> and NOGOA<sup>+</sup> oligodendrocytes were observed. Lesions with marked remyelination are indicated in blue, lesions with limited remyelination in black. OLIG2 = Oligodendrocyte Transcription Factor 2; NDWM = non-demyelinated white matter; active/dm = active/demyelinating lesions; RM 0/1 = remyelination score 0 or 1; RM 2/3 = remyelination score 2 or 3

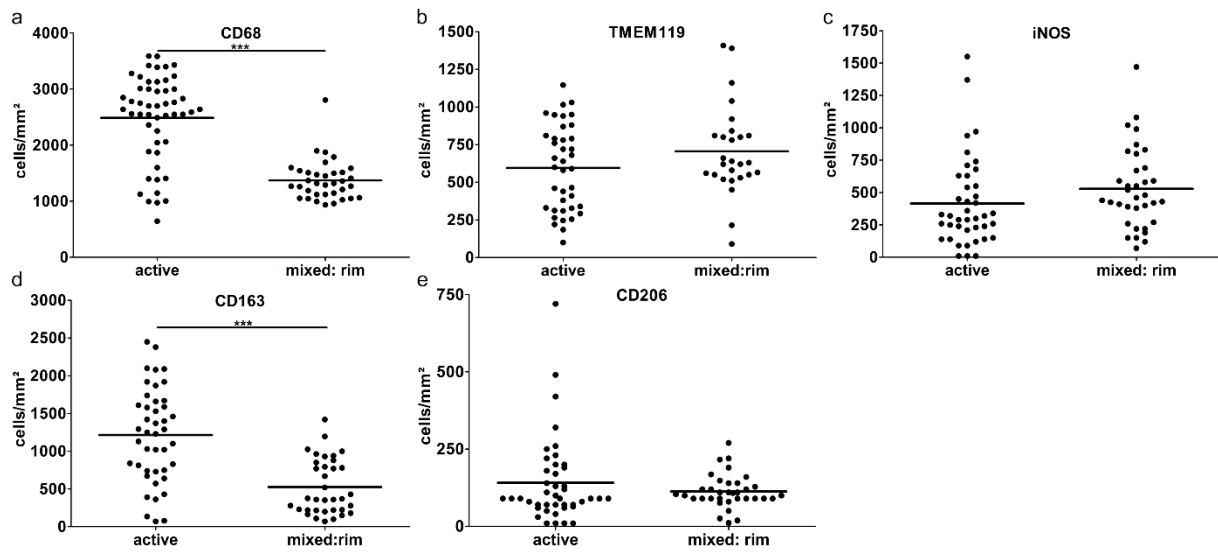

**Fig. S2** Absolute numbers of myeloid cells in active and mixed lesions. **a to e** Quantification of absolute numbers of CD68<sup>+</sup>, TMEM119<sup>+</sup>, iNOS<sup>+</sup>, CD163<sup>+</sup> and CD206<sup>+</sup> myeloid cells in active lesion and in the rim of mixed lesions. CD68/163/206 = Cluster of Differentiation 68/163/206; TMEM119 = Transmembrane Protein 119; iNOS = inducible Nitric Oxide Synthase; active = active lesions; mixed: rim = rim of mixed active/inactive lesions
